# Supplementary material
Source: ML conference proceedings conference paper supplement (https://www.ecva.net/papers/eccv_2020/papers_ECCV/html/123670103_ECCV_2020_paper.php)
Supplement: Supplementary file 1 [file 123670103-supp.zip]

# Supplementary Material: Privacy Preserving Visual SLAM

Mikiya Shibuya\* <sup>1,2</sup>, Shinya Sumikura\* <sup>1</sup>, and Ken Sakurada\* <sup>1</sup>

<sup>1</sup> National Institute of Advanced Industrial Science and Technology (AIST)

<sup>2</sup> Tokyo Institute of Technology

{mikiya-shibuya, sumikura.shinya, k.sakurada}@aist.go.jp

shibuya@m.titech.ac.jp

## 1 Overview

This document is to provide a supplementary description of the main paper, especially concerning the quantitative and qualitative evaluation of our experimental results in Sections 4.4 and 4.5. Additionally, visual materials such as trajectory figures and maps illustrate the results for comparative analysis among the tested datasets or applied methods.

## 2 Dataset Details

Tables 1 and 2 show the details of the CARLA and KITTI datasets for quantitative evaluation in the main paper (Sec. 4.4), respectively. Table 3 shows the details of the Campus dataset (Scene A, B) and the Desk dataset for qualitative evaluation (Sec. 4.5). Figures 1 and 2 show sample images of the CARLA and Campus datasets, respectively.

**Table 1.** CARLA dataset for quantitative evaluation

| Sequence pair #         | Image size    |               |                 |
|-------------------------|---------------|---------------|-----------------|
|                         | Perspective   | Fisheye       | Equirectangular |
| #01                     | 640 × 360     | N/A           | N/A             |
| #02 – 12                | 1280 × 720    | 1280 × 720    | 2160 × 1080     |
| Length (Sequence 1 / 2) |               |               |                 |
| #01                     | #02           | #03           | #04             |
| 1m07s / 1m04s           | 2m20s / 1m16s | 2m08s / 1m28s | 1m40s / 1m49s   |
| #05                     | #06           | #07           | #08             |
| 2m11s / 1m34s           | 2m47s / 1m34s | 2m20s / 2m00s | 2m21s / 2m04s   |
| #09                     | #10           | #11           | #12             |
| 2m26s / 1m58s           | 2m45s / 3m46s | 2m56s / 2m53s | 2m23s / 2m17s   |

\* The authors assert equal contribution and joint first authorship.

**Table 2.** KITTI dataset for quantitative evaluation

| Sequence pair | Image size | Length (Sequence 1 / 2) |
|---------------|------------|-------------------------|
| #00           | 1246 × 376 | 1m15s / 6m18s           |
| #05           | 1226 × 370 | 1m20s / 3m16s           |

**Table 3.** Campus dataset (Scene A, B) and Desk dataset for qualitative evaluation

| Dataset | Image size  |             |                 |
|---------|-------------|-------------|-----------------|
|         | Perspective | Fisheye     | Equirectangular |
| Scene A | 1920 × 1080 | 1920 × 1080 | 1920 × 960      |
| Scene B | 1920 × 1080 | 1920 × 1080 | 1920 × 960      |
| Desk    | 960 × 540   | N/A         | N/A             |

  

| Dataset | Length (Sequence 1 / 2) |               |                 |
|---------|-------------------------|---------------|-----------------|
|         | Perspective             | Fisheye       | Equirectangular |
| Scene A | 5m13s / 5m55s           | 5m29s / 5m42s | 4m47s / 5m00s   |
| Scene B | 3m23s / 2m44s           | 2m23s / 2m19s | 1m48s / 1m51s   |
| Desk    | 3m14s / 3m13s           | N/A           | N/A             |

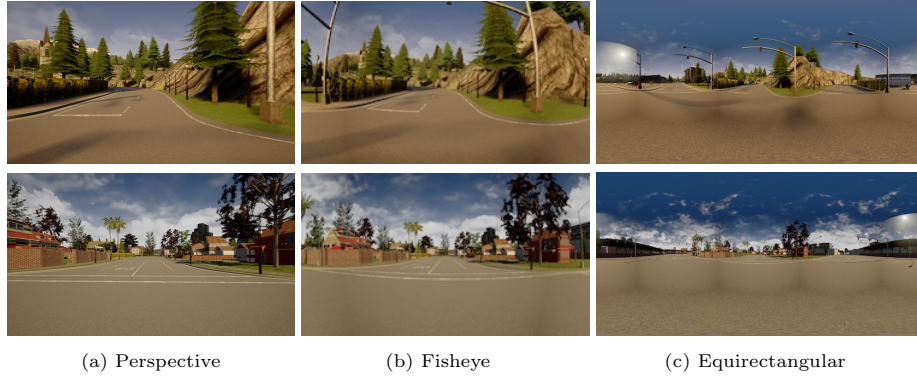**Fig. 1.** Sample images of the CARLA dataset. The three images in each row show the same scene with different projection models (perspective, fisheye, equirectangular).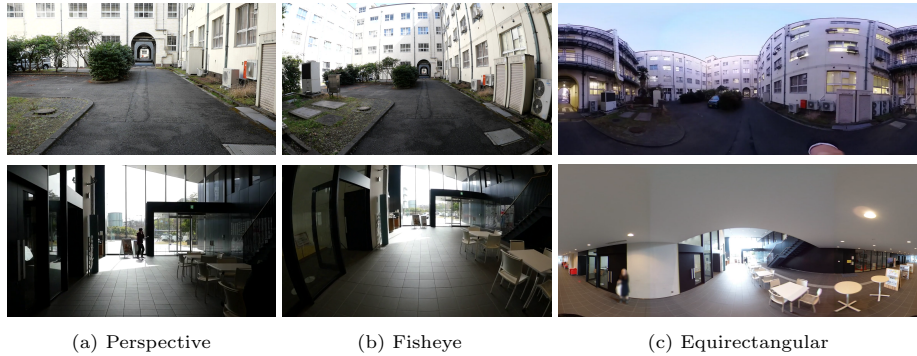**Fig. 2.** Sample images of the Campus dataset (top: Scene A, bottom: Scene B).

### 3 Additional Results

Figure 3 shows the trajectories of the CARLA dataset for evaluation of the tracking time in the main paper. Figures 4 and 5 show the trajectories of the CARLA and KITTI datasets for evaluation of the localization accuracy. Figure 6 shows the trajectories of the CARLA dataset for evaluation of the effectiveness of the global bundle adjustments.

Figure 7 shows an example of the tracking and mapping behavior of LC-VSLAM for the privacy protection on the Desk dataset: (a) scene for prebuilt map where personal objects exist (Sequence 1), (b) scene for LC-VSLAM where the personal objects have been removed (Sequence 2), (c) a point cloud reconstructed from the video of the Sequence 1 with a standard point-based Visual SLAM, (d) a line cloud converted from the point cloud, and (e) mixed line and point clouds after tracking by LC-VSLAM. The 3D points of the concealed privacy objects are not restored near the corresponding 3D lines.

Figures 8 and 9 show all the results of the Campus dataset for the three projection models (perspective, fisheye and equirectangular). The blue lines and the black points show the prebuilt line cloud and the reconstructed point cloud by LC-VSLAM, respectively. The green and red frames show the keyframes. The order from the first (left) to the last (right) columns represents examples of the reconstruction process.

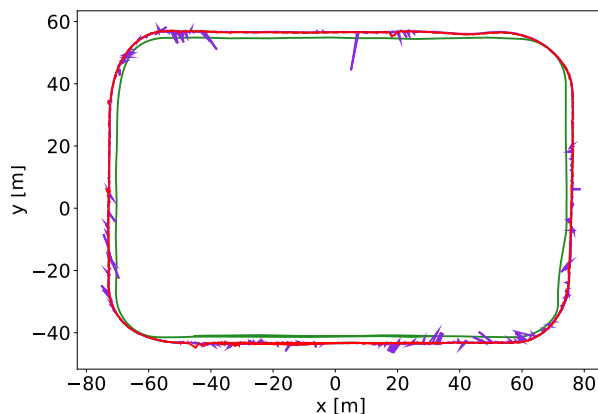

(a) Sequence pair #01 of the CARLA dataset (Perspective projection model)

— LC-VSLAM    — p6L    - - - - Ground truth    — Prebuilt map

**Fig. 3.** Trajectories on the CARLA dataset for evaluation of the tracking time: estimated by LC-VSLAM (red), estimated by p6L (violet), ground truth (black), and prebuilt map (green).

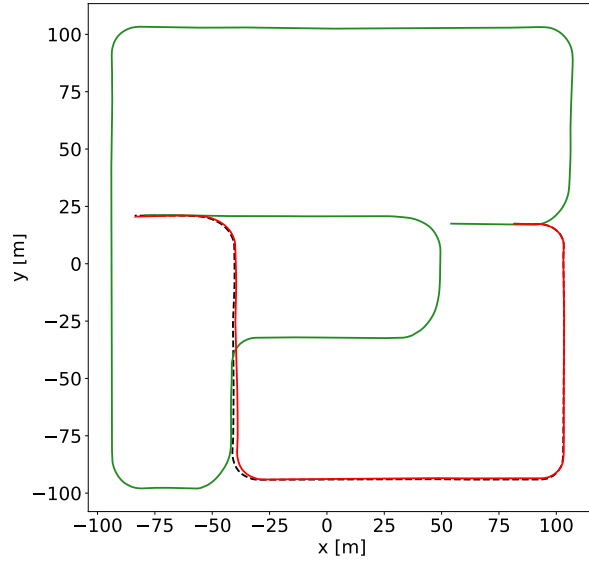

(a) Sequence pair #02 of the CARLA dataset (Perspective projection model)

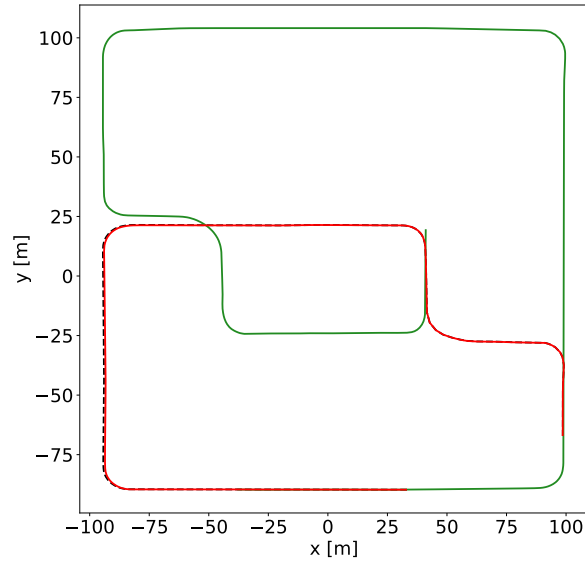

(b) Sequence pair #03 of the CARLA dataset (Perspective projection model)

— LC-VSLAM    — Point-based VSLAM    - - - Ground truth    — Prebuilt map

**Fig. 4.** Trajectories of the CARLA dataset (Sequences #02 and #03). For the evaluation of the localization accuracy: estimated by LC-VSLAM (red), estimated by a standard Visual SLAM with a point-cloud prebuilt map (blue), ground truth (black), and prebuilt map (green).

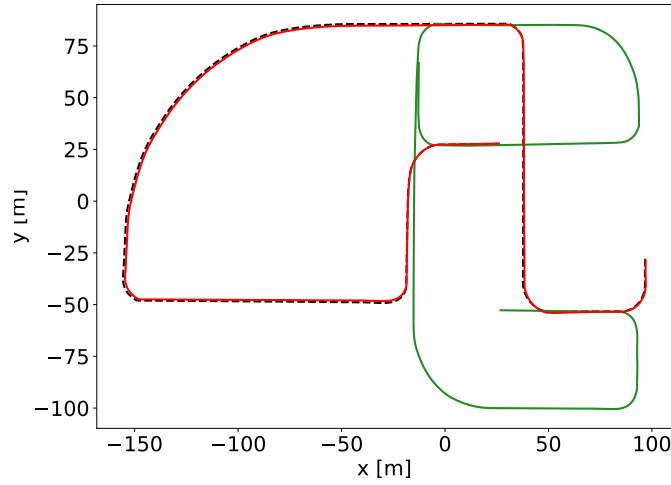

(c) Sequence pair #04 of the CARLA dataset (Fisheye projection model)

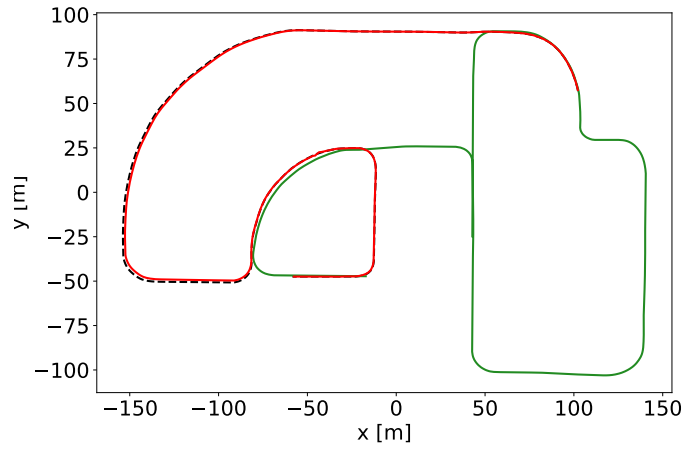

(d) Sequence pair #05 of the CARLA dataset (Perspective projection model)

— LC-VSLAM    — Point-based VSLAM    - - - Ground truth    — Prebuilt map

**Fig. 4.** Trajectories of the CARLA dataset (Sequences #04 and #05). For the evaluation of the localization accuracy: estimated by LC-VSLAM (red), estimated by a standard Visual SLAM with a point-cloud prebuilt map (blue), ground truth (black), and prebuilt map (green).

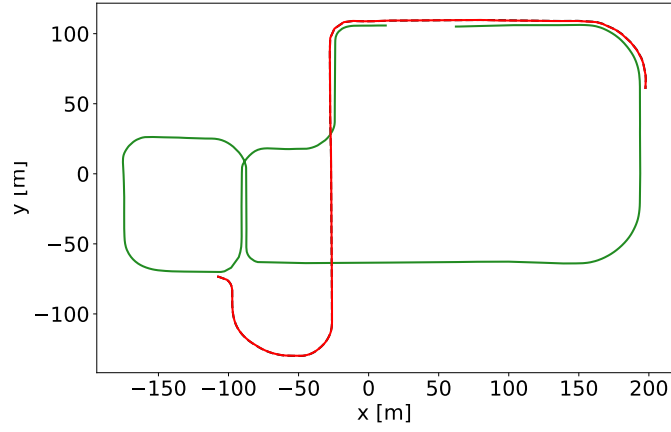

(e) Sequence pair #06 of the CARLA dataset (Equirectangular projection model)

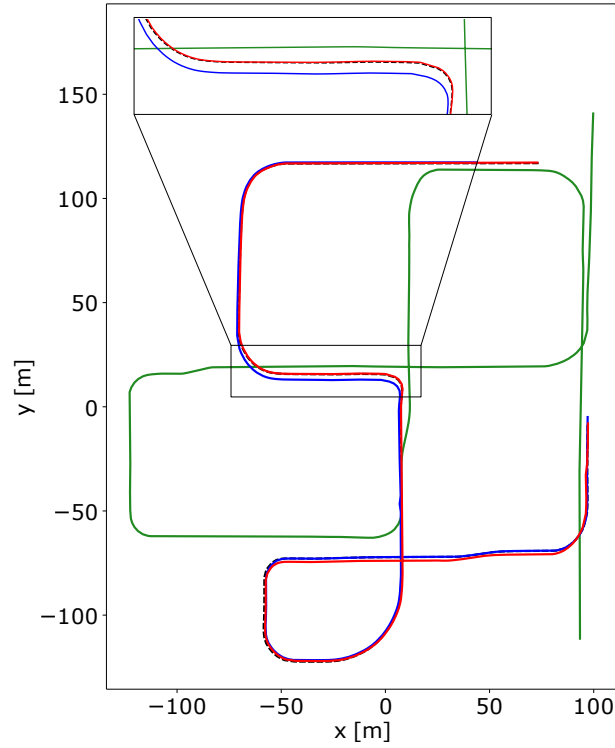

(f) Sequence pair #07 of the CARLA dataset (Perspective projection model)

— LC-VSLAM    — Point-based VSLAM    - - - Ground truth    — Prebuilt map

**Fig. 4.** Trajectories of the CARLA dataset (Sequences #06 and #07). For the evaluation of the localization accuracy: estimated by LC-VSLAM (red), estimated by a standard Visual SLAM with a point-cloud prebuilt map (blue), ground truth (black), and prebuilt map (green).

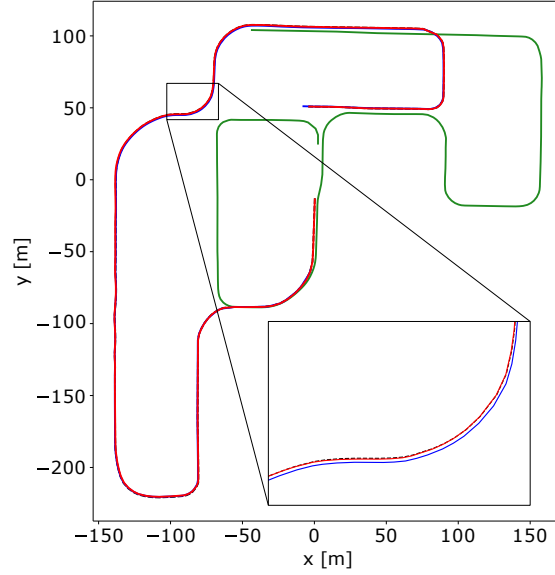

(g) Sequence pair #08 of the CARLA dataset (Equirectangular projection model)

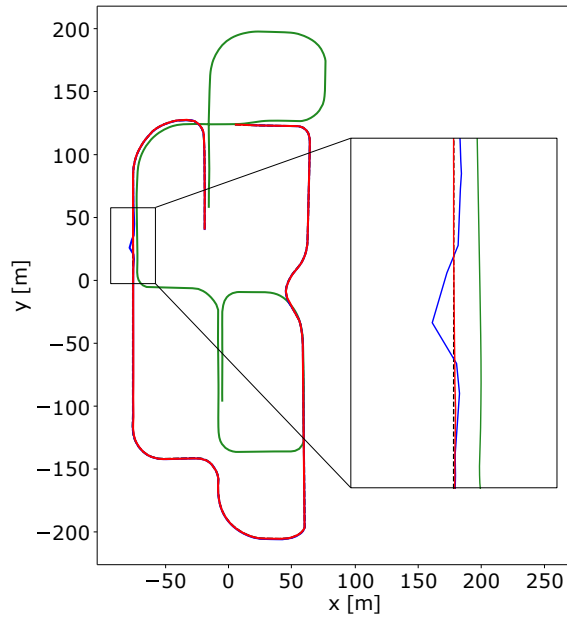

(h) Sequence pair #09 of the CARLA dataset (Fisheye projection model)

— LC-VSLAM    — Point-based VSLAM    - - - Ground truth    — Prebuilt map

**Fig. 4.** Trajectories of the CARLA dataset (Sequences #08 and #09). For the evaluation of the localization accuracy: estimated by LC-VSLAM (red), estimated by a standard Visual SLAM with a point-cloud prebuilt map (blue), ground truth (black), and prebuilt map (green).

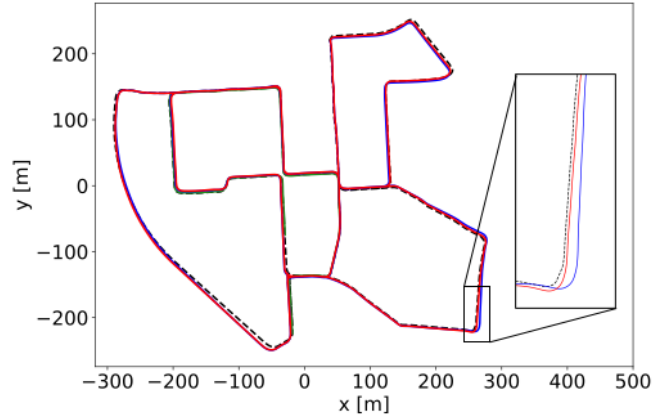

(a) Sequence pair #00 of the KITTI dataset

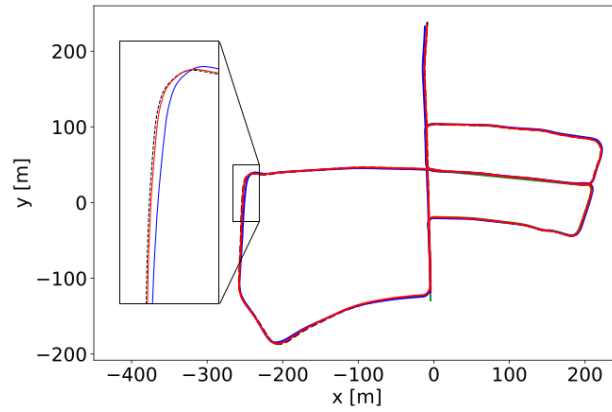

(b) Sequence pair #05 of the KITTI dataset

— LC-VSLAM    — Point-based VSLAM    - - - Ground truth    — Prebuilt map

**Fig. 5.** Trajectories of the KITTI dataset (Sequences #00 and #05). For the evaluation of the localization accuracy: estimated by LC-VSLAM (red), estimated by a standard Visual SLAM with a point-cloud prebuilt map (blue), ground truth (black), and prebuilt map (green).



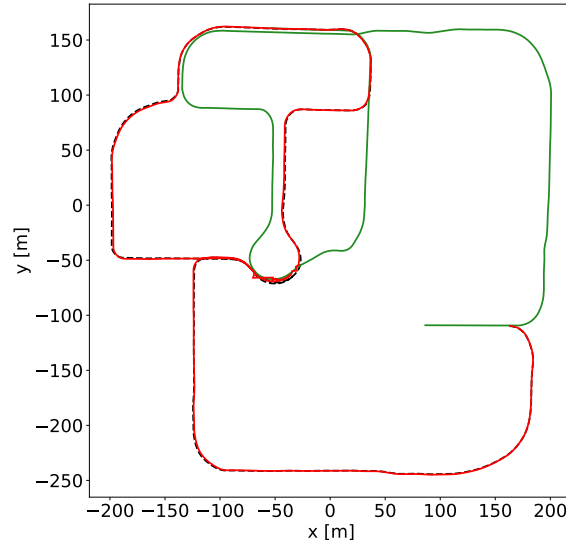

(a) Sequence pair #10 of the CARLA dataset (Fisheye projection model)

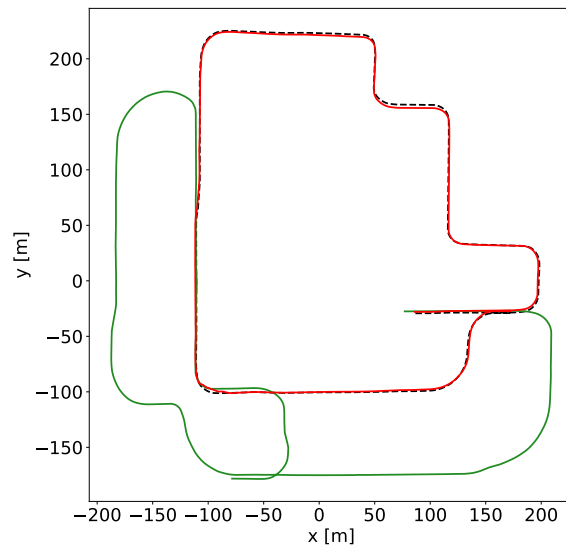

(b) Sequence pair #11 of the CARLA dataset (Fisheye projection model)

— LC-VSLAM    — Point-based VSLAM    - - - Ground truth    — Prebuilt map

**Fig. 6.** Trajectories of the CARLA dataset (Sequences #10 and #11). For evaluation of the effectiveness of the global bundle adjustments : estimated by LC-VSLAM (red), estimated by a standard Visual SLAM with a point-cloud prebuilt map (blue), ground truth (black), and prebuilt map (blue).

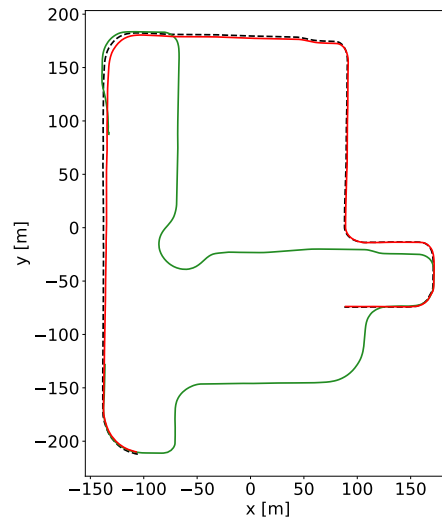

(c) Sequence pair #12 of the CARLA dataset (Fisheye projection model)

— LC-VSLAM    — Point-based VSLAM    - - - Ground truth    — Prebuilt map

**Fig. 6.** Trajectories of the CARLA dataset (Sequence #12). For evaluation of the effectiveness of the global bundle adjustments : estimated by LC-VSLAM (red), estimated by a standard Visual SLAM with a point-cloud prebuilt map (blue), ground truth (black), and prebuilt map (blue).

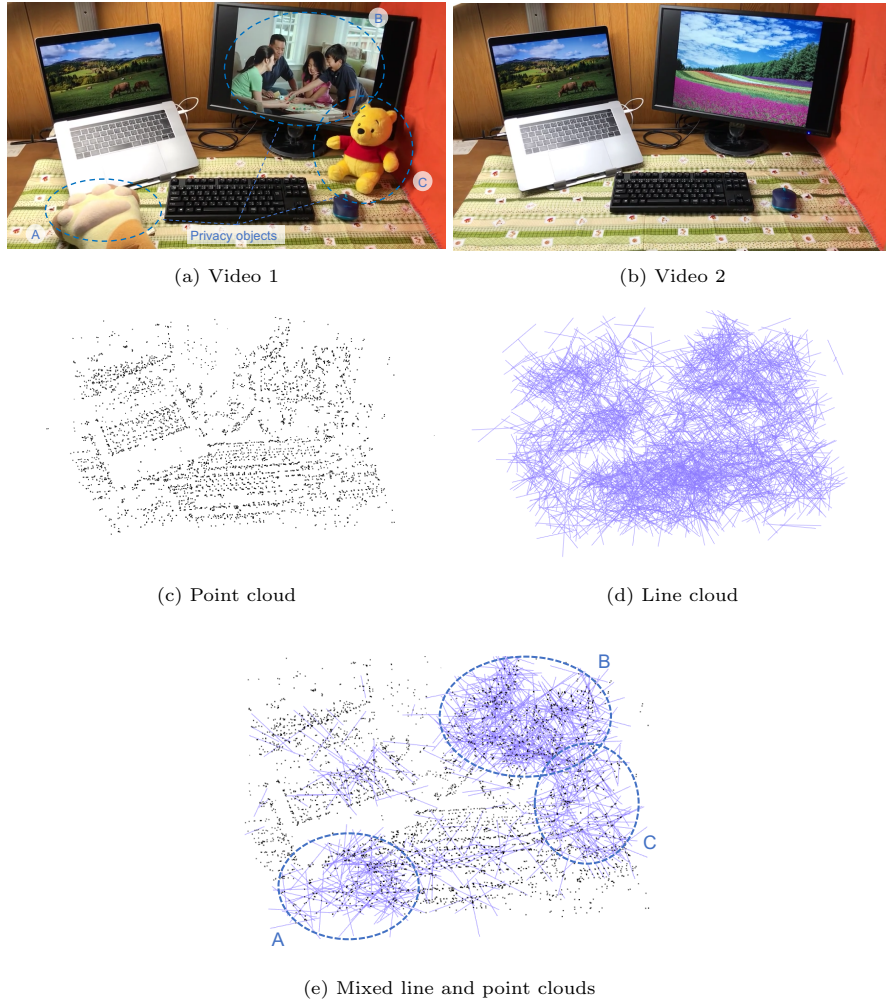

**Fig. 7.** Tracking and mapping behavior of LC-VSLAM for privacy protection on the Desk dataset: (a) scene for prebuilt map where personal objects exist (Video 1), (b) scene for LC-VSLAM where the personal objects have been removed (Video 2), (c) a point cloud reconstructed from Video 1 with a standard point-based Visual SLAM, (d) a line cloud converted from the point cloud, and (e) mixed line and point clouds after tracking by LC-VSLAM. It should be noted here that the 3D points of the concealed privacy objects are not restored near the corresponding 3D lines.

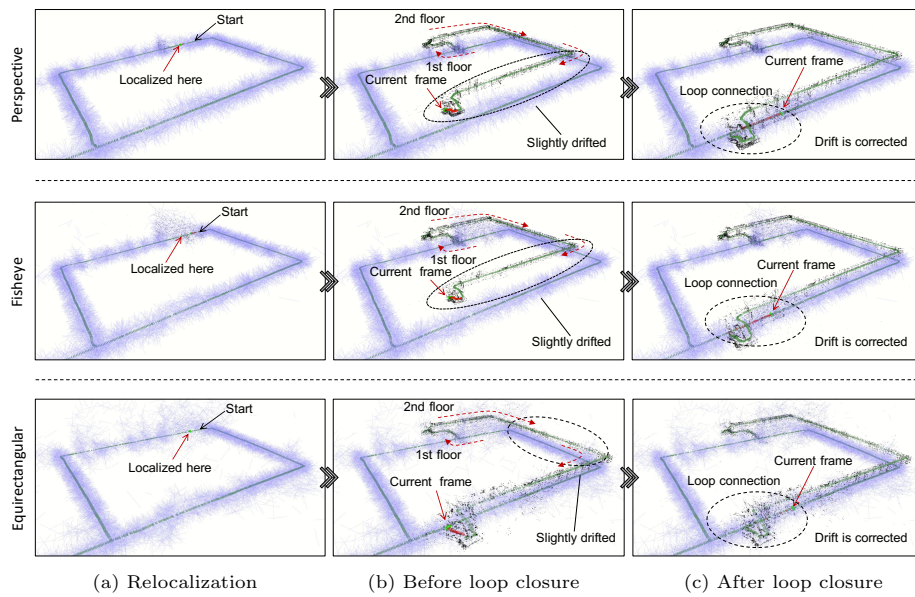

**Fig. 8.** Behavior of relocalization, tracking, local and global mapping for each projection model on the Scene A of the Campus dataset: (a) relocalization, (b) drifted and (c) corrected trajectories before and after loop closure.

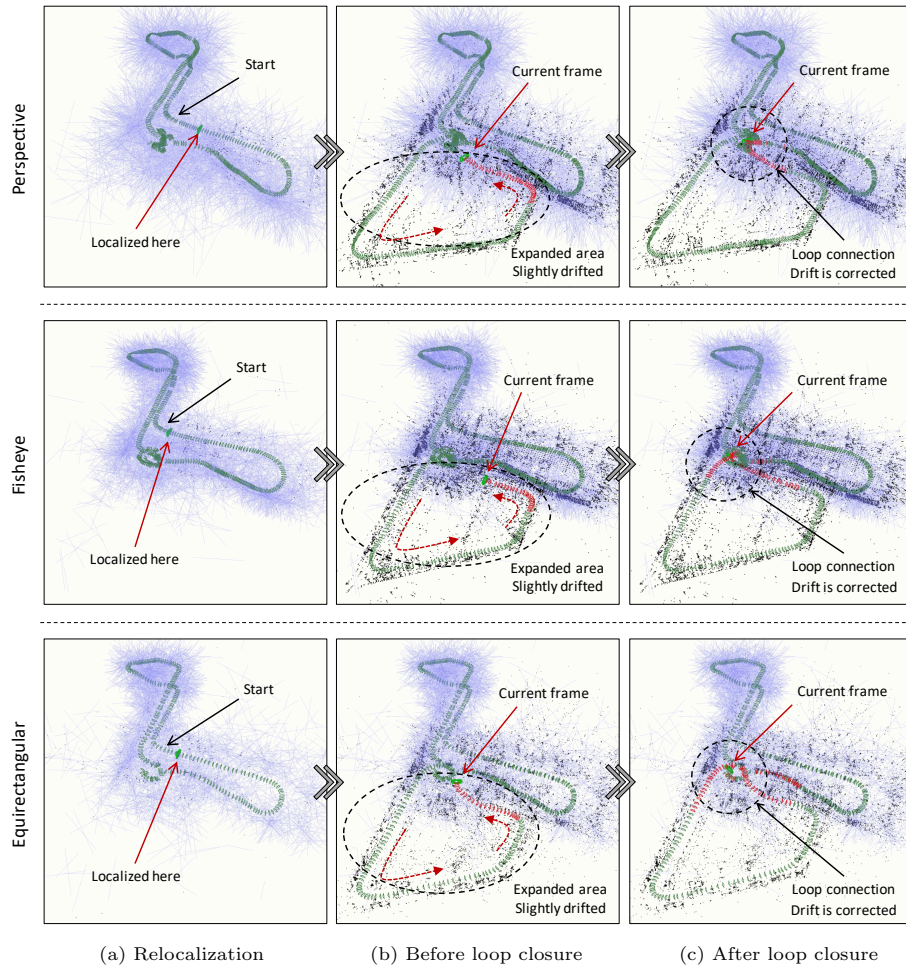

**Fig. 9.** Behavior of relocalization, tracking, local and global mapping for each projection model on the Scene B of the Campus dataset: (a) relocalization, (b) drifted and (c) corrected trajectories before and after loop closure.
